# Supplementary material for: Comparison of suction blistering and tape stripping for analysis of epidermal genes, proteins and lipids
Source: Springer Nature journal article supplement (doi:10.1007/s00403-017-1776-6), 2017-09-13
Supplement: MOESM1 [file 15056242]

Supplementary material

Article title: Comparison of suction blistering and tape stripping for analysis of epidermal genes, proteins and lipids

Authors: Marek Svoboda, Marta Hlobilová, Markéta Marešová, Michaela Sochorová, Andrej Kováčik, Kateřina Vávrová, Iva Dolečková

Correspondence:

Marek Svoboda, Research and Development, Contipro a.s., Dolní Dobrouč, Czech Republic

E-mail: marek.svoboda@upce.cz

Figure S1.


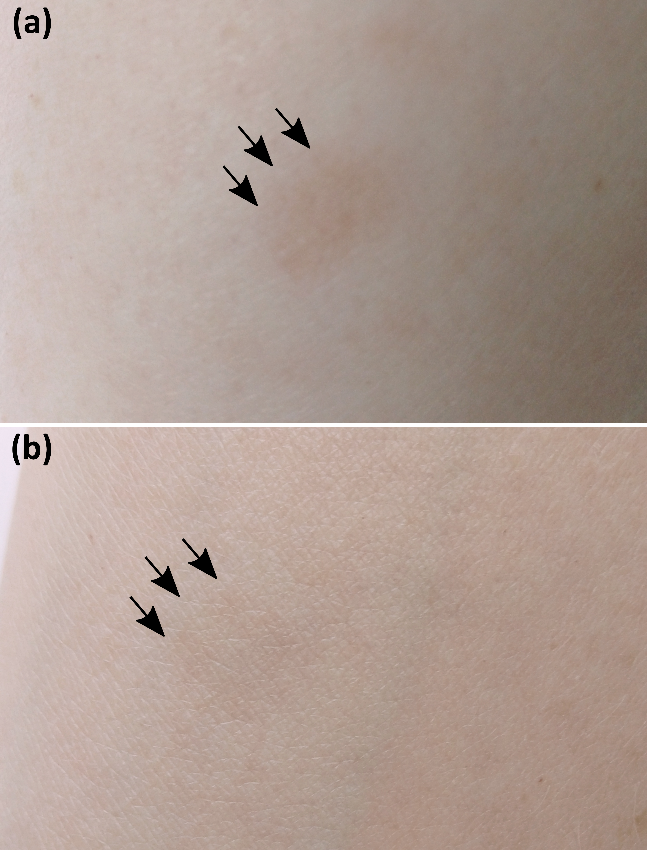


**Figure S1** Hyperpigmentation occured in some of the volunteers after the SB procedure. Images show hyperpigmented zones **(arrows)** one month **(a)** and six months **(b)** after the SB procedure.
